# Supplementary material
Source: publisher figshare collection journal article supplement (https://frontiersin.figshare.com/ndownloader/files/24121025)

| **PRIMER ID** | **5’ – 3’ sequence** |
| --- | --- |
|  |  |
| **BsaI_tRNA-F** | TAGGTCTCAGGCAACAAAGCACCAGTGG |
| **CM16_g1*R** | CGGGTCTCACGCAGTTGGACTGCACCAGCCGGGAA |
| **CM16_g1*F** | CGGGTCTCCTGCGTTCTCCTCTGTTTTAGAGCTAGAA |
| **CM3_g1R** | TAGGTCTCATAGCCAAGTCTGTGCACCAGCCGGG |
| **CM3_g1F** | CGGGTCTCCGCTAGAATACCAGTTTTAGAGCTAGAA |
| **CM3_g2-R** | TAGGTCTCATCCCAGGGGTGTGCACCAGCCGGG |
| **CM3_g2-F** | CGGGTCTCCGGGACGCAGCTGCGTTTTAGAGCTAGAA |
| **CM3_g3R** | TAGGTCTCAGTTACAACAAATGCACCAGCCGGG |
| **CM3_g3F** | CGGGTCTCCTAACACATAGTCGGTTTTAGAGCTAGAA |
| **CM16_g6R** | CGGGTCTCAACGAGACTTTGCACCAGCCGGGAA |
| **CM16_g6F** | CGGGTCTCCTCGTCCGGATCAGAGGTTTTAGAGCTAGAA |
| **CM16_g4R** | TAGGTCTCAATGCGACATGTGCACCAGCCGGG |
| **CM16_g4F** | CGGGTCTCCGCATCGAAACGCCCGTTTTAGAGCTAGAA |
| **CM3_g5+R** | TAGGTCTCAACTGCTGAGAATGCACCAGCCGGGAA |
| **CM3_g5+F** | CGGGTCTCCCAGTGCCGGTGCGGTTTTAGAGCTAGAA |
| **BsaI_gRNA-R** | TAGGTCTCCAAACAAAAAAAAAAGCACCGACTCG |

**TABLE S1*.***Primers used for the Golden Gate assembly. Highlighted in green the BsaI sites, in red tRNA sequence and in blue gRNA scaffold sequence

|  | **PRIMER ID** | **5' - 3' Sequence** | **Fw/Rv** | **Application** |
| --- | --- | --- | --- | --- |
|  |  |  |  |  |
|  | **CM3_104_F** | AGACAGCTTGCATTCCCCTC | Fv | TIDE |
|  | **CM3_1009_R** | CGCTTTGGCCTTTGACAGAC | Rv | TIDE |
| ***CM3* GENE** | **CM3_106_F** | ATATGCGAGCATGTGTGGCG | Fv | PCR |
| **CM3_542_R** | TCACCAACATTGCCGGACCT | Rv | PCR/RT-PCR |
| **CM3_123_F** | GCGCATCCAGCATAAACTCA | Fv | HRM/RT-PCR |
| **CM3_307_R** | AGTGTGGCAGAAGATTGGTC | Rv | HRM |
| **CM3_288_F** | GACCAATCTTCTGCCACACT | Fv | HRM |
| **CM3_500_R** | ACCGGCAACGCTATGAAGTA | Rv | HRM |
|  |  |  |  |  |
| ***CM16* GENE** | **CM16_58_F** | AGCTTGCATTCCCCTCCAAA | Fv | TIDE |
| **CM16_821_R** | AGCACCACACATGATGAGCG | Rv | TIDE |
| **CM16_128_F** | CGTGTAGCATACACCCACCA | Fv | PCR |
| **CM16_578_R** | TCGTCAAGTTGCAGTACCCC | Rv | PCR |
| **CM16_169_F** | ATACCAACGAACTGGGCCTG | Fv | HRM/RT-PCR |
| **CM16_296_R** | TGGGGTGCAATCTTCATTGC | Rv | HRM |
| **CM16_331_F** | CCGTGACTATGTGGAACAAC | Fv | HRM |
| **CM16_542_R** | TCACGAAGTCCATCTGCACC | Rv | HRM/RT-PCR |
|  |  |  |  |  |
| **0.28 GENE** | **AAI0.28_83F** | CATAACAGTGGTCCTTGGAGT | Fv | RT-PCR |
| **AAI0.28_1R** | TTGACTAGACGTCCGGATAC | Rv | RT-PCR |

**Table S2.** Primers used to amplify *CM3*, *CM16* and *0.28* genes for mutation screening, High Resolution Melting analysis and gene expression.

|  | **PRIMER ID** | **5' - 3' Sequence** | **Fw/Rv** |
| --- | --- | --- | --- |
|  |  |  |  |
| **pRRes217.486** | **p486_5394_F** | CAAGGTCCGCGAGATCAACA | Fv |
| **p486_3529_F** | TTCGACCAGTCCAAGAACGG | Fv |
| **p486_4059_R** | CTTCACCTTGGTCAGCTCGT | Rv |
| **p486_3210_R** | GGAGAGAGCGATGAGGTTGC | Rv |
| **p486_6228_F** | CAACGAGCAAAAGCAGCTGT | Fv |
| **p486_6672_R** | CATGCGGCCGCTAAGTTAAC | Rv |
|  |  |  |  |
| **pRRes208.482-PTG** | **p482_U3_F** | GCTTAATGCGCCGCTACAGG | Fv |
| **p482_U3_2F** | TGGTAGCTCTTGATCCGGCAAA | Fv |
| **p482_U3_R** | TGCCACGGATCATCTGCACA | Rv |
| **p482_U3_2R** | TTGCGCTGCCATTCTCCAAATT | Rv |

**TABLE S3*.***Primers used for the detection of CRISPR constructs.


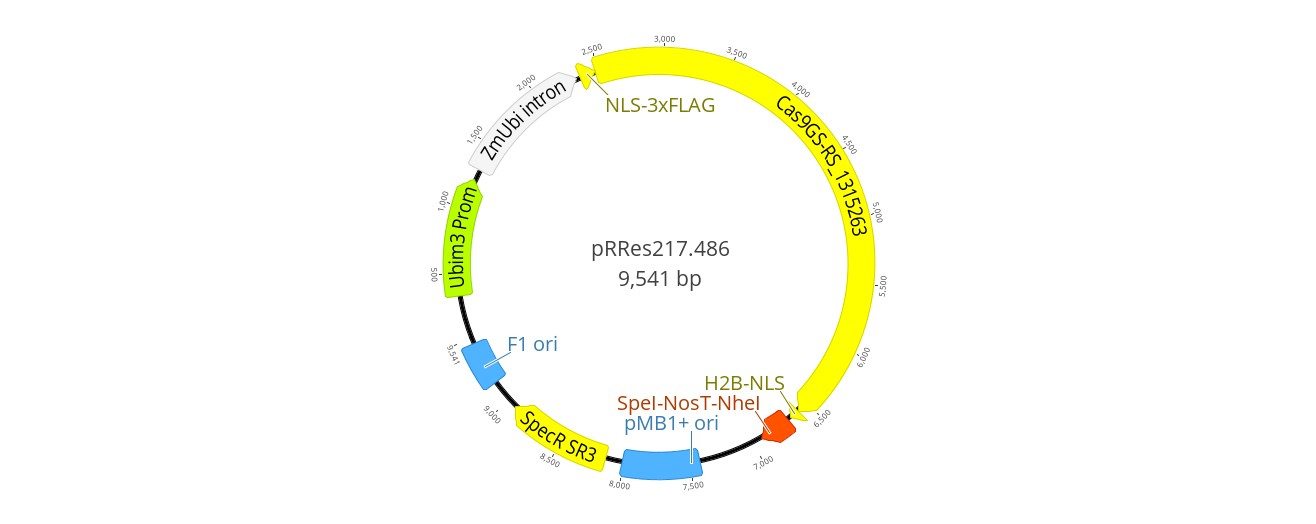


**B**

**A**


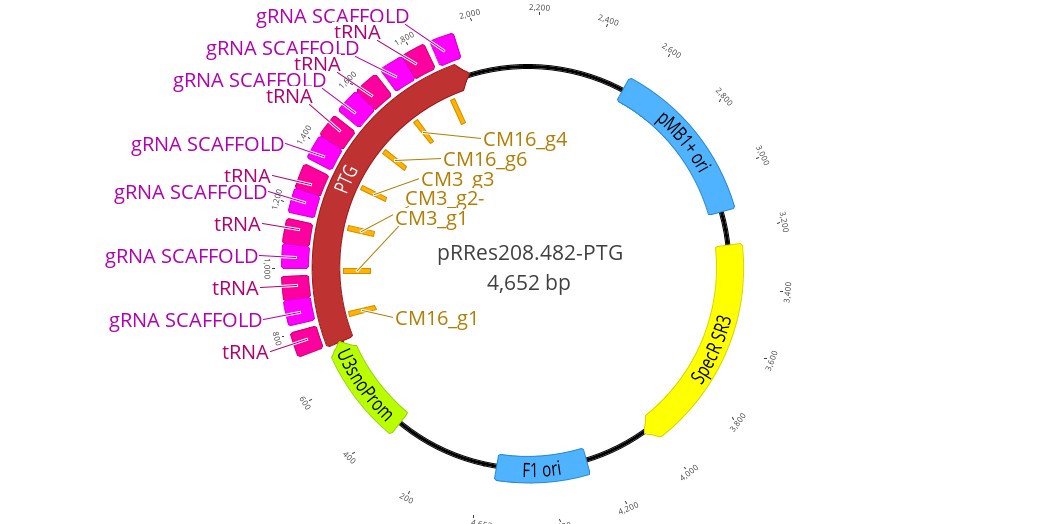


**FIGURE S1*.*** CRISPR constructs used for biolistic transformation. (A) Plasmid vector containing the Cas9 sequence under the control of a maize ubiquitin promoter (Zm Ubim3), two Nuclear Localization Signals (NLS) and nopaline synthase terminator (NosT); (B) Plasmid vector containing gRNAs in the polycistronic tRNA/gRNA (PTG) architecture under the control of the rice U3 small nucleolar RNA promoter.

**FIGURE S2*.*** Alignment of Sanger sequencing of 0.28 PCR amplicon obtained from the two edited lines and the 0.28 reference gene from bread (TraesCS_WMAI-0.28) and durum (TRITD_WMAI-0.28) wheat.


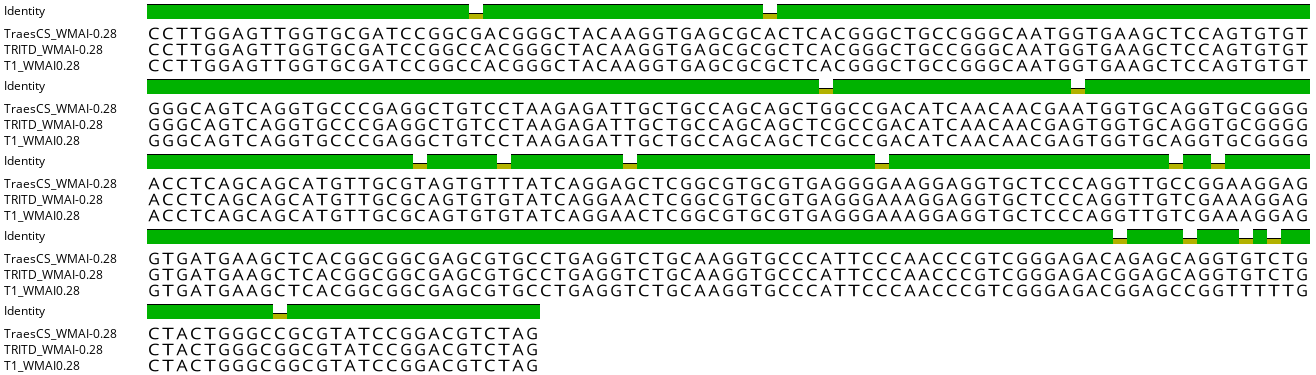

Supplement: Supplementary file 1 [file 24121025]
